# Supplementary material
Source: PubMed Central journal article supplement (PMC4356235)
Supplement: Supp_Figure1.pdf [file Supp_Figure1.pdf]

## Supplementary Data

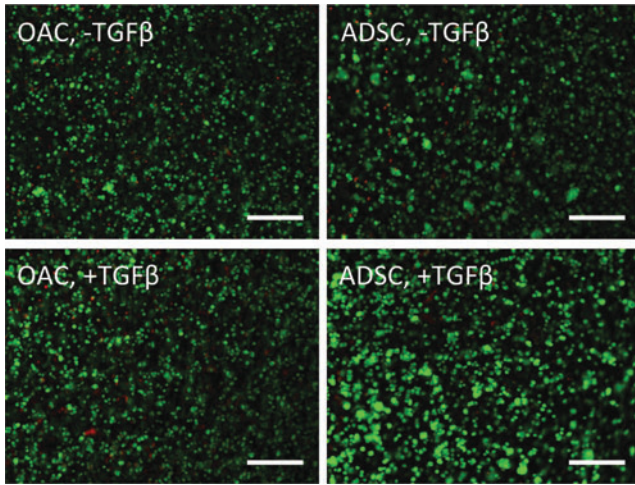

**SUPPLEMENTARY FIG. S1.** Live/dead viability staining of cell-hydrogel constructs at 24 h postencapsulation showing >80% viability in osteoarthritic chondrocyte (OAC) and adipose-derived stem cell (ADSC) cultured in chondrogenic medium with or without transforming growth factor (TGF)- $\beta$ . Scale bar = 100  $\mu$ m.
