# Supplementary material
Source: PubMed Central journal article supplement (PMC4356235)
Supplement: Supp_Figure2.pdf [file Supp_Figure2.pdf]

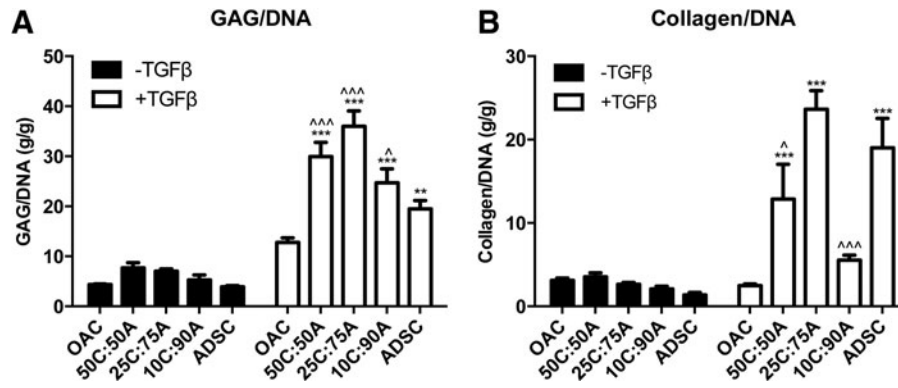

**SUPPLEMENTARY FIG. S2.** (A) sGAG and (B) collagen content per DNA in mixed co-culture at day 21 without or without TGF- $\beta$ 3 supplementation. Data presented as mean  $\pm$  SD ( $n=3$  samples/group). \* and ^ represent significance versus OAC and ADSC control under the same media condition, respectively; \* $p < 0.05$ , \*\* $p < 0.01$ , and \*\*\* $p < 0.001$ .
