# Supplementary material
Source: PubMed Central journal article supplement (PMC4356235)
Supplement: Supp_Tables.pdf [file Supp_Tables.pdf]

**Table S1:** List of primers used for real-time polymerase chain reaction.

| <b>Gene Name</b>          | <b>Primer Sequence</b>            | <b>GenBank No.</b> |
|---------------------------|-----------------------------------|--------------------|
| <b>GAPDH</b>              | F: 5' CGCTCTCTGCTCCTCCTGTT 3'     | NM_002046.3        |
|                           | R: 5' CCATGGTGTCTGAGCGATGT 3'     |                    |
| <b>Aggrecan<br/>(Agg)</b> | F: 5' TGAGGAGGGCTGGAACAAGTACC 3'  | NM_001135.3        |
|                           | R: 5' GGAGGTGGTAATTGCAGGGAACA 3'  |                    |
| <b>COL2A1<br/>(COL2)</b>  | F: 5' TCACGTACACTGCCCTGAAG 3'     | NM_001844.4        |
|                           | R: 5' TTGCAACGGATTGTGTTGTT 3'     |                    |
| <b>COL1A2<br/>(COL1)</b>  | F: 5' AGGGCAACAGCAGGTTCACTTACA 3' | NM_000089.3        |
|                           | R: 5' AGCGGGGGAAGGAGTTAATGAAAC 3' |                    |
| <b>COL10A1<br/>(COLX)</b> | F: 5' CCCTTTTGTGCTGCTAGTATCC 3'   | NM_000493.3        |
|                           | R: 5' CTGTTGTCCAGGTTTTCTGGCAC 3'  |                    |
| <b>MMP-3</b>              | F: 5' AGAGGTGACTCCACTCACAT 3'     | NM_002422.3        |
|                           | R: 5' GGTCTGTGAGTGAGTGATAG 3'     |                    |
| <b>MMP-13</b>             | F: 5' TTGAGCTGGACTCATTGTCG 3'     | NM_002427.3        |
|                           | R: 5' GGAGCCTCTCAGTCATGGAG 3'     |                    |
| <b>ADAMTS-5</b>           | F: 5' AAATTCTGTGAAGAGACCTTTGGT 3' | NM_007038.3        |
|                           | R: 5' GCTGGTAAGGATGGAAGACATTAA 3' |                    |

**Table S2.** Interaction index for gene expression in conditioned medium (CM) and bi-layered (Bi) co-culture.

| <b>Gene expression<br/>Cells/TGF-<math>\beta</math>3 /Culture</b> | <b>Agg<br/>Avg +/- Stdev</b> | <b>COL2<br/>Avg +/- Stdev</b> | <b>COL1<br/>Avg +/- Stdev</b> | <b>COLX<br/>Avg +/- Stdev</b> |
|-------------------------------------------------------------------|------------------------------|-------------------------------|-------------------------------|-------------------------------|
| C/ - / CM                                                         | 0.82 +/- 0.13                | 0.95 +/- 0.02                 | 0.58 +/- 0.17                 | 0.89 +/- 0.33                 |
| A/ - / CM                                                         | 0.55 +/- 0.32                | 1.44 +/- 0.28                 | 1.19 +/- 0.12                 | 0.43 +/- 0.01                 |
| C/ + / CM                                                         | 0.59 +/- 0.06                | 0.59 +/- 0.17                 | 0.54 +/- 0.18                 | 0.39 +/- 0.26                 |
| A/ + / CM                                                         | 0.42 +/- 0.08                | 0.30 +/- 0.10                 | 0.76 +/- 0.18                 | 0.48 +/- 0.13                 |
| C+A / - / Bi                                                      | 1.24 +/- 0.28                | 1.13 +/- 0.12                 | 0.58 +/- 0.11                 | 2.03 +/- 1.10                 |
| C+A / + / Bi                                                      | 0.79 +/- 0.12                | 0.02 +/- 0.004                | 0.24 +/- 0.02                 | 0.03 +/- 0.005                |

**Table S3.** Interaction index for biochemical content in conditioned medium (CM) and bi-layered (Bi) co-culture.

| <b>Biochemical Content<br/>Cells/TGF-<math>\beta</math>3 /Culture</b> | <b>DNA/w.w.<br/>Avg +/- Stdev</b> | <b>GAG/w.w.<br/>Avg +/- Stdev</b> | <b>Collagen/w.w.<br/>Avg +/- Stdev</b> |
|-----------------------------------------------------------------------|-----------------------------------|-----------------------------------|----------------------------------------|
| C/ - / CM                                                             | 0.91 +/- 0.02                     | 0.85 +/- 0.13                     | 0.78 +/- 0.15                          |
| A/ - / CM                                                             | 1.01 +/- 0.12                     | 0.91 +/- 0.12                     | 1.33 +/- 0.30                          |
| C/ + / CM                                                             | 1.02 +/- 0.08                     | 0.88 +/- 0.15                     | 1.85 +/- 0.28                          |
| A/ + / CM                                                             | 0.81 +/- 0.12                     | 0.70 +/- 0.09                     | 0.46 +/- 0.15                          |
| C+A / - / Bi                                                          | 0.83 +/- 0.05                     | 0.73 +/- 0.09                     | 1.25 +/- 0.28                          |
| C+A / - / Bi                                                          | 0.90 +/- 0.09                     | 0.48 +/- 0.13                     | 0.34 +/- 0.11                          |

**Table S4.** Interaction index for gene expression in mixed co-culture.

| <b>Gene Expression</b>                 | <b>Agg<br/>Avg +/- Stdev</b> | <b>COL2<br/>Avg +/- Stdev</b> | <b>COL1<br/>Avg +/- Stdev</b> | <b>COLX<br/>Avg +/- Stdev</b> |
|----------------------------------------|------------------------------|-------------------------------|-------------------------------|-------------------------------|
| <b>without TGF-<math>\beta</math>3</b> |                              |                               |                               |                               |
| 50C:50A                                | 2.46 +/- 0.18                | 0.75 +/- 0.04                 | 1.02 +/- 0.07                 | 1.20 +/- 0.47                 |
| 25C:75A                                | 5.95 +/- 0.08                | 1.01 +/- 0.18                 | 0.86 +/- 0.13                 | 1.34 +/- 0.51                 |
| 10C:90A                                | 13.83 +/- 1.80               | 2.56 +/- 0.52                 | 1.10 +/- 0.07                 | 1.24 +/- 0.18                 |
| <b>with TGF-<math>\beta</math>3</b>    |                              |                               |                               |                               |
| 50C:50A                                | 1.16 +/- 0.20                | 0.72 +/- 0.14                 | 1.32 +/- 0.04                 | 0.57 +/- 0.20                 |
| 25C:75A                                | 1.38 +/- 0.20                | 0.65 +/- 0.04                 | 0.77 +/- 0.06                 | 0.45 +/- 0.21                 |
| 10C:90A                                | 1.29 +/- 0.19                | 0.66 +/- 0.10                 | 0.77 +/- 0.02                 | 0.31 +/- 0.11                 |

**Table S5.** Interaction index for biochemical content in mixed co-culture.

| <b>Biochemical Content</b>             | <b>DNA/w.w.<br/>Avg +/- Stdev</b> | <b>GAG/w.w.<br/>Avg +/- Stdev</b> | <b>Collagen/w.w.<br/>Avg +/- Stdev</b> |
|----------------------------------------|-----------------------------------|-----------------------------------|----------------------------------------|
| <b>without TGF-<math>\beta</math>3</b> |                                   |                                   |                                        |
| 50C:50A                                | 0.80 +/- 0.02                     | 1.49 +/- 0.23                     | 1.22 +/- 0.19                          |
| 25C:75A                                | 0.91 +/- 0.07                     | 1.58 +/- 0.06                     | 1.29 +/- 0.17                          |
| 10C:90A                                | 1.00 +/- 0.05                     | 1.33 +/- 0.22                     | 1.30 +/- 0.19                          |
| <b>With TGF-<math>\beta</math>3</b>    |                                   |                                   |                                        |
| 50C:50A                                | 1.03 +/- 0.07                     | 1.99 +/- 0.16                     | 1.52 +/- 0.53                          |
| 25C:75A                                | 1.25 +/- 0.14                     | 2.60 +/- 0.39                     | 2.17 +/- 0.29                          |
| 10C:90A                                | 0.76 +/- 0.02                     | 1.01 +/- 0.14                     | 0.25 +/- 0.03                          |
